# Supplementary material for: Tinostamustine (EDO-S101), an Alkylating Deacetylase Inhibitor, Enhances the Efficacy of Daratumumab in Multiple Myeloma by Upregulation of CD38 and NKG2D Ligands
Source: MDPI journal article supplement (doi:10.3390/ijms25094718), 2024-04-26
Supplement: s1 [file s1]

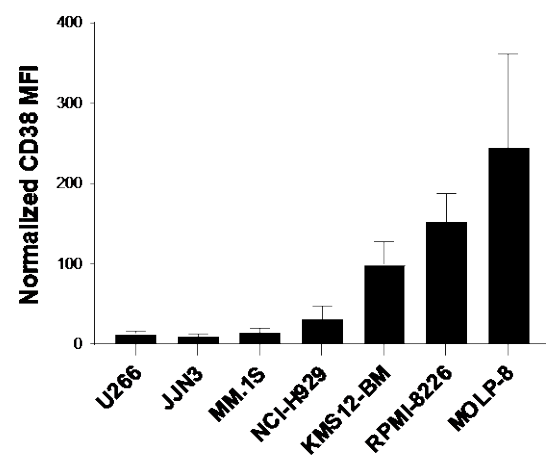

**Figure S1.** Normalized MFI expression of CD38 on myeloma cell lines analyzed by flow cytometry.

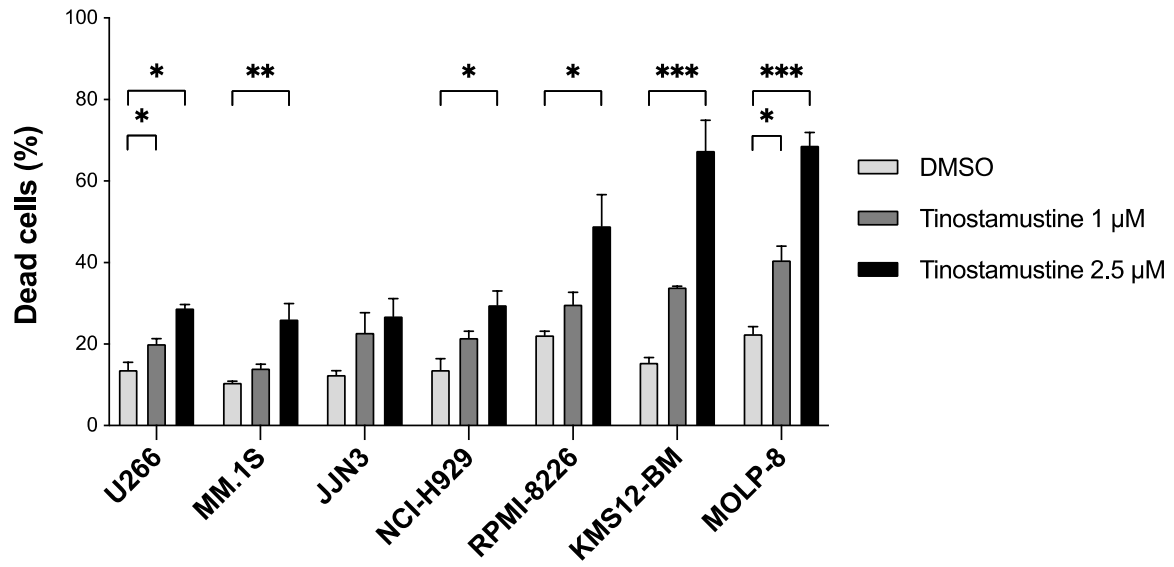

**Figure S2. Evaluation of the cytotoxic effect of tinostamustine in MM cell lines.** The indicated MM cell lines were incubated with increasing doses of tinostamustine for 48 hours. Cytotoxicity was analyzed by flow cytometry after staining with Annexin V/7AAD. Each bar shows mean  $\pm$  SEM (n=3). Statistically significant differences were evaluated by one-way ANOVA followed by Tukey's HSD post-hoc test (\*p<0.05; \*\*p<0.01; \*\*\*p<0.001).

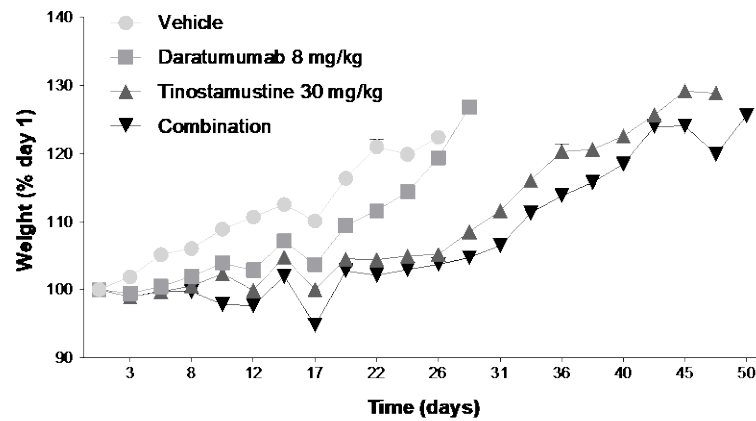

**Figure S3. Effect of the administration of each treatment on body weight of NK cell-humanized NSG mice.** The body weight of mice was monitored throughout the treatment period, and the percentage of weight at each time point was calculated considering day 1 as 100%. X-axes express the time in days from the beginning of the treatment.

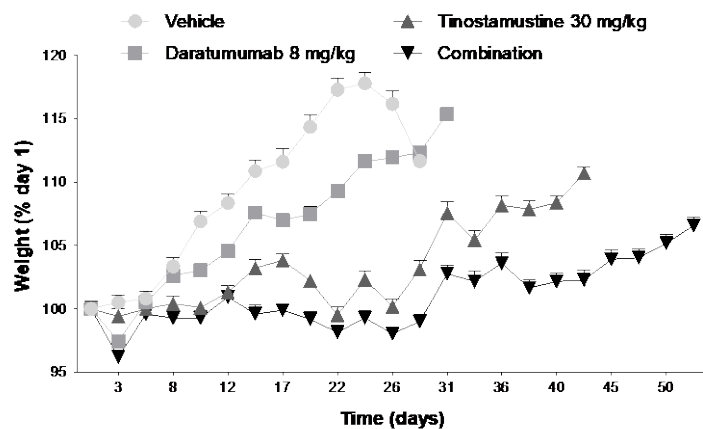

**Figure S4. Effect of the administration of each treatment on body weight of CB17-SCID mice.** The body weight of mice was monitored throughout the treatment period, and the percentage of weight at each time point was calculated considering day 1 as 100%. X-axes express the time in days from the beginning of the treatment.

**Table S1. Effect of tinostamustine on the expression of several ligands for NKG2D and DNAM-1 as assessed by flow cytometry.** Median fluorescence intensity (MFI) levels of the indicated ligands normalized to isotype control after treatment with tinostamustine (1 and 2.5  $\mu$ M) for 48 hours. Results are shown as the percentage with respect to the expression in DMSO-treated cells, which was considered as 100%. Expression levels correspond to the average of three experiments. Absence of expression is indicated as “-”.

|           | Tinostamustine<br>( $\mu$ M) | ULBP2            | ULBP3            | CD155            | CD112            |
|-----------|------------------------------|------------------|------------------|------------------|------------------|
| JJN3      | 0                            | 100              | -                | 100              | -                |
|           | 1                            | 110.5 $\pm$ 9.5  | -                | 161.4 $\pm$ 14.3 | -                |
|           | 2.5                          | 112.9 $\pm$ 13.4 | -                | 156.8 $\pm$ 24.7 | -                |
| MM.1S     | 0                            | 100              | -                | 100              | -                |
|           | 1                            | 95.8 $\pm$ 4.5   | -                | 113.3 $\pm$ 3.9  | -                |
|           | 2.5                          | 96.3 $\pm$ 12.3  | -                | 111.5 $\pm$ 15.3 | -                |
| RPMI-8226 | 0                            | -                | 100              | 100              | 100              |
|           | 1                            | -                | 111.7 $\pm$ 14.8 | 123.9 $\pm$ 6.1  | 116.6 $\pm$ 13.2 |
|           | 2.5                          | -                | 129.6 $\pm$ 20.2 | 168.2 $\pm$ 24.8 | 142.8 $\pm$ 11.5 |
| MOLP-8    | 0                            | 100              | -                | -                | -                |
|           | 1                            | 116.1 $\pm$ 4.6  | -                | -                | -                |
|           | 2.5                          | 124.7 $\pm$ 13.5 | -                | -                | -                |





**Table S4. Patient samples used in the studies.** The table shows the disease status of each patient. The type of study in which each sample was used is indicated in grey-filled cells.

| Patient code | Disease status     | Analysis of CD38 (Fig 1d) | Analysis of MICA (Fig 2c) | Analysis of MICB (Fig 2c) | Analysis of drugs (Fig 4) |
|--------------|--------------------|---------------------------|---------------------------|---------------------------|---------------------------|
| p2043        | Progressive MM     |                           |                           |                           |                           |
| p2048        | Progressive MM     |                           |                           |                           |                           |
| p2049        | Newly diagnosed MM |                           |                           |                           |                           |
| p2053        | Relapsed MM        |                           |                           |                           |                           |
| p2071        | Newly diagnosed MM |                           |                           |                           |                           |
| p2072        | Newly diagnosed MM |                           |                           |                           |                           |
| p2121        | Newly diagnosed MM |                           |                           |                           |                           |
| p2134        | Newly diagnosed MM |                           |                           |                           |                           |
| p2135        | Progressive MM     |                           |                           |                           |                           |
| p2188        | Newly diagnosed MM |                           |                           |                           |                           |
| p2189        | Relapsed MM        |                           |                           |                           |                           |
| p2229        | Relapsed MM        |                           |                           |                           |                           |
| p2246        | Relapsed MM        |                           |                           |                           |                           |
| p2249        | Progressive MM     |                           |                           |                           |                           |
| p2316        | Newly diagnosed MM |                           |                           |                           |                           |
| p2400        | Progressive MM     |                           |                           |                           |                           |
| p2480        | Newly diagnosed MM |                           |                           |                           |                           |
| p2483        | Newly diagnosed MM |                           |                           |                           |                           |
| p2485        | Relapsed MM        |                           |                           |                           |                           |



**Table S5. Primers used for ChIP-PCR.** GAPDH gene was used as a positive control for the histone 3 acetylation (H3Ac), whereas SAT2 gene was used as a negative control for the same histone modification. F letter stands for forward primer and R letter for reverse.

| Gene         | Primers used (5' → 3')      |
|--------------|-----------------------------|
| <b>CD38</b>  | F: CCTCGCTTTCACCGGGAAAT     |
|              | R: TGC GGGATTTTGCTATCCCA    |
| <b>GAPDH</b> | F: TACTAGCGGTTTTACGGGCG     |
|              | R: TCGAACAGGAGGAGCAGAGAGCGA |
| <b>SAT2</b>  | F: CATCGAATGGAAATGAAAGGAGTC |
|              | R: ACCATTGGATGATTGCGATCAA   |
